# Supplementary material
Source: PubMed Central journal article supplement (PMC6682431)
Supplement: NIHMS1530602-supplement-Supplemental_Publication_Material.pdf [file NIHMS1530602-supplement-Supplemental_Publication_Material.pdf]

## SUPPLEMENTAL MATERIAL

**Supplemental Table 1. Definition of Microvascular Diseases**

| Microvascular Disease                             | ICD-9 Code/Condition         |
|---------------------------------------------------|------------------------------|
| <b>Peripheral neuropathy</b>                      |                              |
| Due to secondary diabetes                         | 249.6                        |
| Diabetes                                          | 250.6, 355.8, 355.9          |
| Idiopathic                                        | 337.0, 337.00, 337.09, 337.1 |
| Polyneuropathy                                    | 356.9                        |
| Uremic                                            | 585.9                        |
| <b>Retinopathy</b>                                |                              |
| Secondary Diabetes with Ophthalmic manifestations | 249.5                        |
| Diabetes with Ophthalmic manifestations           | 250.5                        |
| Diabetic retinopathy                              | 362.01-6                     |
| Other intraretinal microvascular abnormalities    | 362.17                       |
| Other background retinopathy                      | 362.11-14                    |
| Retinal vascular occlusion                        | 362.3                        |
| <b>Nephropathy</b>                                |                              |
| Renal Disease                                     | Presence of Proteinuria      |

**Supplemental Table 2. Definition of PAD**

| <b>ICD-9 Diagnosis and ICD-9 Procedure codes used in ascertaining PAD cases (Inclusion Codes)</b>                                           |                                                                                             |                                                                                                                                                                                                                                                            |
|---------------------------------------------------------------------------------------------------------------------------------------------|---------------------------------------------------------------------------------------------|------------------------------------------------------------------------------------------------------------------------------------------------------------------------------------------------------------------------------------------------------------|
| <i>Description</i>                                                                                                                          | <i>ICD-9 Diagnosis Codes</i>                                                                |                                                                                                                                                                                                                                                            |
| Atherosclerosis of Native Arteries of the Lower Extremities                                                                                 | 440.20, 440.21, 440.22, 440.23, 440.24, 440.29, 440.30, 440.31, 440.32, 440.8, 440.9, 443.9 |                                                                                                                                                                                                                                                            |
| <i>Description</i>                                                                                                                          | <i>ICD-9 Procedure Codes</i>                                                                | <i>CPT Codes</i>                                                                                                                                                                                                                                           |
| Lower Extremity Peripheral Angioplasty, Atherectomy, or Endarterectomy                                                                      | 38.81, 39.50                                                                                | 35302, 35303, 35304, 35305, 35306, 35331, 35351, 35355, 35361, 35363, 35371, 35372, 35381, 35452, 35454, 35456, 35459, 35470, 35472, 35473, 35474, 35481, 35482, 35483, 35485, 35491, 35492, 35493, 35495                                                  |
| Lower Extremity Peripheral Bypass                                                                                                           | 39.25, 39.29                                                                                | 35521, 35533, 35537, 35538, 35539, 35540, 35541, 35546, 35548, 35549, 35551, 35556, 35558, 35563, 35565, 35566, 35571, 35582, 35583, 35585, 35587, 35621, 35623, 35637, 35638, 35641, 35646, 35647, 35651, 35654, 35656, 35661, 35663, 35665, 35666, 35671 |
| Repair, Exploration, Revision, Resection of Lower Extremity Arteries, or Thrombectomy of Graft                                              | 38.08, 38.38, 38.48, 39.49, 39.56, 39.57, 39.58                                             | 35226, 35256, 35286, 35700, 35721, 35741, 35876, 35879, 35881, 35883, 35884                                                                                                                                                                                |
| Non-Coronary Vessel Percutaneous Transluminal Mechanical Thrombectomy, or Stents                                                            | 39.90                                                                                       | 37184, 37185, 37186, 37205, 37206, 37207, 37208                                                                                                                                                                                                            |
| Diagnostic Procedures                                                                                                                       | 38.29, 88.42, 88.48, 88.77                                                                  | 75630, 75631, 75710, 75711, 75712, 75716, 75717, 75718, 93925, 93926, 93978, 74175, 72191, 73706, 75635, 74185, 72198, 73725, 93922, 93924                                                                                                                 |
| <b>ICD-9-CM Diagnosis Codes Used to Exclude Non-Atherosclerotic Causes of PAD and Procedures with Non-PAD Indications (Exclusion Codes)</b> |                                                                                             |                                                                                                                                                                                                                                                            |
| <i>Description</i>                                                                                                                          | <i>ICD-9 Diagnosis Codes</i>                                                                |                                                                                                                                                                                                                                                            |

|                                          |                                                                                                                                                                                                                                                                                                                                                                                                                                                                                                                                                                                                                                                                                                                                                                                                                                                                                                                                                                                                                                                                                                                                                                                                                                                                                                                                                                                                                                                                                                                                                                                                                                                                                                                                                                                                                                                                                                                                                                                                                                                                                                                                                       |
|------------------------------------------|-------------------------------------------------------------------------------------------------------------------------------------------------------------------------------------------------------------------------------------------------------------------------------------------------------------------------------------------------------------------------------------------------------------------------------------------------------------------------------------------------------------------------------------------------------------------------------------------------------------------------------------------------------------------------------------------------------------------------------------------------------------------------------------------------------------------------------------------------------------------------------------------------------------------------------------------------------------------------------------------------------------------------------------------------------------------------------------------------------------------------------------------------------------------------------------------------------------------------------------------------------------------------------------------------------------------------------------------------------------------------------------------------------------------------------------------------------------------------------------------------------------------------------------------------------------------------------------------------------------------------------------------------------------------------------------------------------------------------------------------------------------------------------------------------------------------------------------------------------------------------------------------------------------------------------------------------------------------------------------------------------------------------------------------------------------------------------------------------------------------------------------------------------|
| Non-Atherosclerotic Causes of PAD        | 237.70, 237.71, 237.72, 237.73, 237.79, 443.1, 446.0, 446.4, 446.5, 446.6, 446.7, 447.6, 710.1, 747.1, 747.22, 747.64                                                                                                                                                                                                                                                                                                                                                                                                                                                                                                                                                                                                                                                                                                                                                                                                                                                                                                                                                                                                                                                                                                                                                                                                                                                                                                                                                                                                                                                                                                                                                                                                                                                                                                                                                                                                                                                                                                                                                                                                                                 |
| Lower Extremity Trauma/Injury and Others | 736.30, 736.31, 736.32, 736.39, 736.4, 736.41, 736.42, 736.5, 736.6, 736.70, 736.71, 736.72, 736.73, 736.74, 736.75, 736.76, 736.79, 736.81, 736.89, 736.9, 735.0, 735.1, 735.2, 735.3, 735.4, 735.5, 735.8, 735.9, 754.30, 754.31, 754.32, 754.33, 754.35, 754.40, 754.41, 754.42, 754.43, 754.44, 754.50, 754.51, 754.52, 754.53, 754.59, 754.60, 754.61, 754.62, 754.69, 754.70, 754.71, 754.79, 755.02, 755.13, 755.14, 755.30, 755.31, 755.32, 755.33, 755.34, 755.35, 755.36, 755.37, 755.38, 755.39, 755.4, 755.60, 755.61, 755.62, 755.63, 755.64, 755.65, 755.66, 755.67, 755.69, 755.8, 759.7, 759.89, 890.0, 890.1, 890.2, 891.0, 891.1, 891.2, 895.0, 895.1, 896.0, 896.1, 896.2, 896.3, 897.0, 897.1, 897.2, 897.3, 897.4, 897.5, 897.6, 897.7, 820.00, 820.01, 820.02, 820.03, 820.09, 820.10, 820.11, 820.12, 820.13, 820.19, 820.20, 820.21, 820.22, 820.30, 820.31, 820.32, 820.8, 820.9, 821.00, 821.01, 821.10, 821.11, 821.20, 821.21, 821.22, 821.23, 821.29, 821.30, 821.31, 821.32, 821.33, 821.39, 822.0, 822.1, 823.00, 823.01, 823.02, 823.10, 823.11, 823.12, 823.20, 823.21, 823.22, 823.30, 823.31, 823.32, 823.40, 823.41, 823.42, 823.80, 823.81, 823.82, 823.90, 823.91, 823.92, 824.0, 824.1, 824.2, 824.3, 824.4, 824.5, 824.6, 824.7, 824.8, 824.9, 825.0, 825.1, 825.20, 825.21, 825.22, 825.23, 825.24, 825.25, 825.29, 825.30, 825.31, 825.32, 825.33, 825.34, 825.35, 825.39, 826.0, 826.1, 827.0, 827.1, 828.0, 828.1, 829.0, 829.1, 835.00, 835.01, 835.02, 835.03, 835.10, 835.11, 835.12, 835.13, 836.0, 836.1, 836.2, 836.3, 836.4, 836.50, 836.51, 836.52, 836.53, 836.54, 836.59, 836.60, 836.61, 836.62, 836.63, 836.64, 836.69, 837.0, 837.1, 838.00, 838.01, 838.02, 838.03, 838.04, 838.05, 838.06, 838.09, 838.10, 838.11, 838.12, 838.13, 838.14, 838.15, 838.16, 838.19, 904.0, 904.1, 904.2, 904.3, 904.40, 904.41, 904.42, 904.50, 904.51, 904.52, 904.53, 904.54, 904.6, 904.7, 904.8, 904.9, 928.00, 928.01, 928.10, 928.11, 928.20, 928.21, 928.3, 928.8, 928.9, 929.0, 929.9, 959.6, 959.7, 996.40, 996.41, 996.42, 996.43, 996.44, 996.45, 996.46, 996.47, 996.49, 996.66, 996.67, 996.78 |
| Amputation with Non-PAD Indications      | 170.6, 170.7, 170.8, 170.9, 171.3, 172.7, 173.70, 173.71, 173.72, 173.79, 198.5, 344.1, 711.00, 711.01, 711.02, 711.03, 711.04, 711.05, 711.06, 711.07, 711.08, 711.09, 728.6, 733.20, 733.21, 733.22, 733.29, 736.30, 736.31, 736.32, 736.39, 736.41, 736.42, 736.5, 736.6, 736.70, 736.71, 736.72, 736.73, 736.74, 736.75, 736.76, 736.79, 736.81, 736.89, 736.9, 735.0, 735.1, 735.2, 735.3, 735.4, 735.5, 735.8, 735.9, 754.30, 754.31, 754.32, 754.33, 754.35, 754.40, 754.41, 754.42, 754.43, 754.44, 754.50, 754.51, 754.52, 754.53, 754.59, 754.60, 754.61, 754.62, 754.69, 754.70, 754.71, 754.79, 755.02, 755.13, 755.14, 755.30, 755.31, 755.32, 755.33, 755.34, 755.35, 755.36, 755.37, 755.38, 755.39, 755.4, 755.60, 755.61, 755.62, 755.63, 755.64, 755.65, 755.66, 755.67, 755.69, 755.8, 759.7, 759.89, 890.0, 890.1, 890.2, 891.0, 891.1, 891.2, 895.0, 895.1, 896.0, 896.1, 896.2, 896.3, 897.0, 897.1, 897.2, 897.3, 897.4, 897.5, 897.6, 897.7, 820.00, 820.01, 820.02, 820.03, 820.09, 820.10, 820.11, 820.12, 820.13, 820.19, 820.20, 820.21, 820.22, 820.30, 820.31, 820.32, 820.8, 820.9, 821.00, 821.01, 821.10, 821.11, 821.20, 821.21, 821.22, 821.23, 821.29, 821.30, 821.31, 821.32, 821.33, 821.39, 822.0, 822.1, 823.00, 823.01, 823.02, 823.10, 823.11, 823.12, 823.20, 823.21, 823.22, 823.30, 823.31, 823.32, 823.40, 823.41, 823.42, 823.80, 823.81, 823.82, 823.90, 823.91, 823.92, 824.0, 824.1, 824.2,                                                                                                                                                                                                                                                                                                                                                                                                                                                                                                                                                                                                                                                                                                         |

|                                                                                                                                                                                                                                                                                                                                                                                                                                                                                                                                                                                                                                                                                                                                                                                                                                                                                                                        |
|------------------------------------------------------------------------------------------------------------------------------------------------------------------------------------------------------------------------------------------------------------------------------------------------------------------------------------------------------------------------------------------------------------------------------------------------------------------------------------------------------------------------------------------------------------------------------------------------------------------------------------------------------------------------------------------------------------------------------------------------------------------------------------------------------------------------------------------------------------------------------------------------------------------------|
| 824.3, 824.4, 824.5, 824.6, 824.7, 824.8, 824.9, 825.0, 825.1, 825.20, 825.21, 825.22, 825.23, 825.24, 825.25, 825.29, 825.30, 825.31, 825.32, 825.33, 825.34, 825.35, 825.39, 826.0, 826.1, 827.0, 827.1, 828.0, 828.1, 829.0, 829.1, 835.00, 835.01, 835.02, 835.03, 835.10, 835.11, 835.12, 835.13, 836.0, 836.1, 836.2, 836.3, 836.4, 836.50, 836.51, 836.52, 836.53, 836.54, 836.59, 836.60, 836.61, 836.62, 836.63, 836.64, 836.69, 837.0, 837.1, 838.00, 838.01, 838.02, 838.03, 838.04, 838.05, 838.06, 838.09, 838.10, 838.11, 838.12, 838.13, 838.14, 838.15, 838.16, 838.19, 904.0, 904.1, 904.2, 904.3, 904.40, 904.41, 904.42, 904.50, 904.51, 904.52, 904.53, 904.54, 904.6, 904.7, 904.8, 904.9, 905.4, 928.00, 928.01, 928.10, 928.11, 928.20, 928.21, 928.3, 928.8, 928.9, 929.0, 929.9, 959.6, 959.7, 996.40, 996.41, 996.42, 996.43, 996.44, 996.45, 996.46, 996.47, 996.49, 996.66, 996.67, 996.78 |
|------------------------------------------------------------------------------------------------------------------------------------------------------------------------------------------------------------------------------------------------------------------------------------------------------------------------------------------------------------------------------------------------------------------------------------------------------------------------------------------------------------------------------------------------------------------------------------------------------------------------------------------------------------------------------------------------------------------------------------------------------------------------------------------------------------------------------------------------------------------------------------------------------------------------|

**Supplemental Table 3: Baseline Risk of Amputation by combination of Microvascular disease and PAD**

| Group                                                                                                                                                                                                                                                                                         | N       | Events | Incidence Rate per 1000 PY | Unadjusted Model      |         | Adjusted Model        |         |
|-----------------------------------------------------------------------------------------------------------------------------------------------------------------------------------------------------------------------------------------------------------------------------------------------|---------|--------|----------------------------|-----------------------|---------|-----------------------|---------|
|                                                                                                                                                                                                                                                                                               |         |        |                            | Hazard Ratio [95% CI] | p-value | Hazard Ratio [95% CI] | p-value |
| No Microvascular disease or PAD                                                                                                                                                                                                                                                               | 109,447 | 650    | 0.71                       | 1.00                  | --      | 1.00                  | ---     |
| Microvascular disease                                                                                                                                                                                                                                                                         | 9125    | 252    | 3.72                       | 5.35 [4.62, 6.19]     | <0.0001 | 2.15 [1.84, 2.51]     | <0.0001 |
| PAD                                                                                                                                                                                                                                                                                           | 5313    | 165    | 4.41                       | 6.37 [5.37, 7.56]     | <0.0001 | 2.83 [2.36, 3.40]     | <0.0001 |
| Microvascular disease and PAD                                                                                                                                                                                                                                                                 | 1789    | 118    | 11.40                      | 17.47 [14.35, 21.26]  | <0.0001 | 3.62 [2.90, 4.52]     | <0.0001 |
| Adjusted Model includes age, sex, race, HIV, prevalent CVD, hypertension, diabetes mellitus, LDL cholesterol, HDL cholesterol, triglycerides, smoking status, HCV Infection, renal failure, BMI, anemia, total bilirubin, alcohol abuse or dependence, cocaine abuse or dependence, and COPD. |         |        |                            |                       |         |                       |         |

**Supplemental Table 4: Distribution of Microvascular Disease Manifestation by Level of Amputation at Time of Amputation In Participants with Isolated Microvascular Disease**

| Manifestation of Microvascular Disease | Level of Amputation    |                       |                       |                  |
|----------------------------------------|------------------------|-----------------------|-----------------------|------------------|
|                                        | Below Ankle Amputation | Below Knee Amputation | Above Knee Amputation | Unknown Location |
| Retinopathy                            | 43 (9%)                | 5 (3%)                | 4 (5%)                | 2 (14%)          |
| Nephropathy                            | 13 (3%)                | 4 (3%)                | 6 (7%)                | 1 (7%)           |
| Neuropathy                             | 47 (10%)               | 18 (12%)              | 15 (18%)              | 1 (7%)           |
| Retinopathy and Nephropathy            | 59 (12%)               | 17 (11%)              | 3 (4%)                | 2 (14%)          |
| Retinopathy and Neuropathy             | 68 (14%)               | 27 (18%)              | 16 (19%)              | 1 (7%)           |
| Nephropathy and Neuropathy             | 72 (15%)               | 29 (19%)              | 24 (28%)              | 2 (14%)          |
| All Three                              | 183 (38%)              | 54 (35%)              | 17 (20%)              | 5 (36%)          |
| <i>Number of Amputations</i>           | <i>485</i>             | <i>154</i>            | <i>85</i>             | <i>14</i>        |

Cells contain column percentages

There is an association between level of amputation and microvascular disease manifestation ( $\chi^2=38.1$ ,  $df=18$ ,  $p=0.004$ ).

**Supplemental Table 5. Time-Updated Risk of Amputation by combination of Microvascular disease and PAD among those with Diabetes Mellitus**

| Group                                                                                                                                                                                                                                                                      | Person-Years | Events | Incidence Rate per 1000 PY | Unadjusted Model        |         | Adjusted Model          |         |
|----------------------------------------------------------------------------------------------------------------------------------------------------------------------------------------------------------------------------------------------------------------------------|--------------|--------|----------------------------|-------------------------|---------|-------------------------|---------|
|                                                                                                                                                                                                                                                                            |              |        |                            | Hazard Ratio [95% CI]   | p-value | Hazard Ratio [95% CI]   | p-value |
| No Microvascular disease or PAD                                                                                                                                                                                                                                            | 82,199       | 88     | 1.07                       | 1.00                    | ---     | 1.00                    | ---     |
| Microvascular disease                                                                                                                                                                                                                                                      | 45,345       | 168    | 3.70                       | 3.30<br>[2.55, 4.27]    | <0.0001 | 3.05<br>[2.35, 3.96]    | <0.0001 |
| PAD                                                                                                                                                                                                                                                                        | 13,120       | 111    | 8.46                       | 7.71<br>[5.81, 10.23]   | <0.0001 | 7.85<br>[5.89, 10.47]   | <0.0001 |
| Microvascular disease and PAD                                                                                                                                                                                                                                              | 19,420       | 405    | 20.85                      | 18.18<br>[14.35, 23.02] | <0.0001 | 15.94<br>[12.35, 20.57] | <0.0001 |
| Adjusted Model includes age, sex, race, HIV, prevalent CVD, hypertension, LDL cholesterol, HDL cholesterol, triglycerides, smoking status, HCV Infection, renal failure, BMI, anemia, total bilirubin, alcohol abuse or dependence, cocaine abuse or dependence, and COPD. |              |        |                            |                         |         |                         |         |

**Supplemental Table 6. Risk of MACE by combination of Microvascular Disease and PAD**

| MACE defined as Death, AMI, and revascularization                                                                                                                                                                                                                              |        |        |                            |                       |         |                       |         |
|--------------------------------------------------------------------------------------------------------------------------------------------------------------------------------------------------------------------------------------------------------------------------------|--------|--------|----------------------------|-----------------------|---------|-----------------------|---------|
| Group                                                                                                                                                                                                                                                                          | N      | Events | Incidence Rate per 1000 PY | Unadjusted Model      |         | Adjusted Model        |         |
|                                                                                                                                                                                                                                                                                |        |        |                            | Hazard Ratio [95% CI] | p-value | Hazard Ratio [95% CI] | p-value |
| No Microvascular disease or PAD                                                                                                                                                                                                                                                | 95,895 | 16,996 | 21.65                      | 1.00                  | --      | 1.00                  | ---     |
| Microvascular disease                                                                                                                                                                                                                                                          | 6773   | 2165   | 42.64                      | 1.98 [1.90, 2.07]     | <0.0001 | 1.17 [1.11, 1.22]     | <0.0001 |
| PAD                                                                                                                                                                                                                                                                            | 2432   | 1013   | 58.03                      | 2.70 [2.53, 2.87]     | <0.0001 | 1.60 [1.50, 1.71]     | <0.0001 |
| Microvascular disease and PAD                                                                                                                                                                                                                                                  | 620    | 314    | 81.76                      | 3.85 [3.44, 4.31]     | <0.0001 | 1.54 [1.37, 1.73]     | <0.0001 |
| MACE defined as AMI and Revascularization                                                                                                                                                                                                                                      |        |        |                            |                       |         |                       |         |
| Group                                                                                                                                                                                                                                                                          | N      | Events | Incidence Rate per 1000PY  | Unadjusted Model      |         | Adjusted Model        |         |
|                                                                                                                                                                                                                                                                                |        |        |                            | Hazard Ratio [95% CI] | p-value | Hazard Ratio [95% CI] | p-value |
| No Microvascular disease or PAD                                                                                                                                                                                                                                                | 95,895 | 3660   | 4.65                       | 1.00                  | --      | 1.00                  | ---     |
| Microvascular disease                                                                                                                                                                                                                                                          | 6773   | 527    | 10.37                      | 2.27 [2.07, 2.49]     | <0.0001 | 1.43 [1.30, 1.57]     | <0.0001 |
| PAD                                                                                                                                                                                                                                                                            | 2432   | 218    | 12.46                      | 2.73 [2.38, 3.13]     | <0.0001 | 1.67 [1.45, 1.92]     | <0.0001 |
| Microvascular disease and PAD                                                                                                                                                                                                                                                  | 620    | 93     | 24.14                      | 5.50 [4.47, 6.75]     | <0.0001 | 2.22 [1.79, 2.75]     | <0.0001 |
| Adjusted Model includes age, sex, race, HIV, hypertension, diabetes mellitus, LDL cholesterol, HDL cholesterol, triglycerides, smoking status, HCV Infection, renal failure, BMI, anemia, total bilirubin, alcohol abuse or dependence, cocaine abuse or dependence, and COPD. |        |        |                            |                       |         |                       |         |
| Those with Prevalent CVD are excluded from these analyses.                                                                                                                                                                                                                     |        |        |                            |                       |         |                       |         |
